# Supplementary material for: Identification of expression quantitative trait loci associated with schizophrenia and affective disorders in normal brain tissue
Source: PLoS Genet. 2018 Aug 24;14(8):e1007607. doi: 10.1371/journal.pgen.1007607 (PMC6126875; doi:10.1371/journal.pgen.1007607)
Supplement: S8 Table — (XLSX) [file pgen.1007607.s025.xlsx]

## Sheet: SupTable_8
Supplementary Table 8: List of significant multi-region cis-eQTLs resulting in amino acid change.
eQTL†	eGene	eQTL Location	Amino Acid Change*	pmeta	FDR
rs16969968	CHRNA5	CHRNA5	D (GAT) --> N (AAT)	2.25733e-21	3.41661e-17
rs1135840	WBP2NL	CYP2D6	S (AGC) --> T (ACC)	1.40112e-17	1.41492e-13
rs3822346	PCDHA10	PCDHA4	P (CCT) --> S (TCT)	1.0328e-12	3.52087e-09
rs7701755	PCDHA10	PCDHA3	S (AGC) --> I (ATC)	1.0328e-12	3.52087e-09
rs9686540	PCDHA10	PCDHA2	E (GAG) --> K (AAG)	1.87891e-12	5.63364e-09
rs2240694	PCDHA10	PCDHA3	C (TGC) --> Y (TAC)	1.92052e-12	5.63364e-09
rs3733708	PCDHA10	PCDHA3	I (ATC) --> V (GTC)	1.92052e-12	5.63364e-09
rs4141841	PCDHA10	PCDHA5	A (GCC) --> V (GTC)	1.92052e-12	5.63364e-09
rs2240695	PCDHA10	PCDHA1	C (TGC) --> F (TTC)	2.14769e-12	5.95591e-09
rs2240696	PCDHA10	PCDHA1	Y (TAT) --> C (TGT)	2.14769e-12	5.95591e-09
rs11167600	PCDHA10	PCDHA2	V (GTG) --> L (CTG)	3.7194e-12	9.34605e-09
rs853684	ZNF603P	ZSCAN31	K (AAA) --> R (AGA)	6.31386e-11	1.0194e-07
rs200484	ZNF603P	HIST1H2BL	L (CTG) --> P (CCG)	2.99722e-10	4.04075e-07
rs9257694	ZSCAN31	OR14J1	M (ATG) --> T (ACG)	3.99378e-10	5.06132e-07
rs16891235	BTN3A2	HIST1H1A	K (AAA) --> R (AGA)	5.98484e-10	6.6595e-07
rs3116855	ZNF603P	OR2J2	Y (TAC) --> H (CAC)	5.28748e-09	3.82947e-06
rs3130743	ZNF603P	OR2J2	T (ACC) --> A (GCC)	5.3576e-09	3.86978e-06
rs1043730	C6orf3	TRAF3IP2	H (CAC) --> Q (CAA)	6.08456e-09	4.27936e-06
rs1997660	ZNF603P	PGDB1	I (ATA) --> V (GTA)	9.19953e-09	6.08401e-06
rs853684	ZSCAN31	ZSCAN31	K (AAA) --> R (AGA)	9.6172e-09	6.21284e-06
rs34525648	BTN3A2	SLC17A2	S (TCG) --> L (TTG)	1.72175e-08	1.00002e-05
rs2306899	DDHD2	DDHD2	T (ACG) --> M (ATG)	1.96723e-08	1.11783e-05
rs2072803	BTN3A2	BTN2A2	A (GCT) --> P (CCT)	3.00197e-08	1.53313e-05
rs4925	GSTO2	GSTO1	A (GCT) --> D (GAT)	3.35224e-08	1.66515e-05
rs3734542	BTN3A2	BTN2A1	R (CGG) --> Q (CAG)	3.52876e-08	1.72217e-05
rs3734543	BTN3A2	BTN2A1	G (GGC) --> A (GCC)	3.52876e-08	1.72217e-05
rs13195509	BTN3A2	BTN2A1	V (GTG) --> M (ATG)	3.52979e-08	1.72217e-05
rs35555795	BTN3A2	BTN1A1	P (CCC) --> S (TCC)	3.52979e-08	1.72217e-05
†Bolded eQTLs denote those that are located within the gene with which they are associated.
*Amino acids are denoted by single letter code. eQTL base pairs are denoted in bold.
